# Supplementary material for: Ion-selective molecular inclusion of organic dyes into pH-responsive gel assemblies of zwitterionic surfactants
Source: Royal Society of Chemistry journal article supplement (doi:10.1039/c9nj01335k), 2019-01-01
Supplement: c9nj01335k1.pdf [file c9nj01335k1.pdf]

**Electronic Supplementary Information**

**Ion-selective molecular inclusion of organic dyes into pH-responsive gel assemblies of zwitterionic surfactants**

**Clara Morita-Imura,<sup>\*a</sup> Yuka Sakurai,<sup>a</sup> Anna Uchiumi<sup>b</sup> and Hitoshi Shindo<sup>b</sup>**

<sup>a</sup> Department of Chemistry, Faculty of Science, Ochanomizu University,  
2-1-1 Otsuka, Bunkyo-ku, Tokyo, 112-8610, JAPAN

<sup>b</sup> Department of Applied Chemistry, Faculty of Science and Engineering, Chuo University,  
1-13-27 Kasuga, Bunkyo-ku, Tokyo 112-8551, JAPAN

\*imura.clara@ocha.ac.jp

**FT-IR Measurement**

Fourier transform infrared (FT-IR) spectra with a resolution of  $2\text{ cm}^{-1}$  were obtained using a Nicolet 6700 FT-IR spectrometer (Thermo Fisher Scientific) equipped with a single-reflection ATR accessory and diamond crystal. For each spectrum, 1000 scans were recorded and averaged. All samples were prepared in  $\text{D}_2\text{O}$ , and pH was adjusted to 4 by titration of DCl solution.

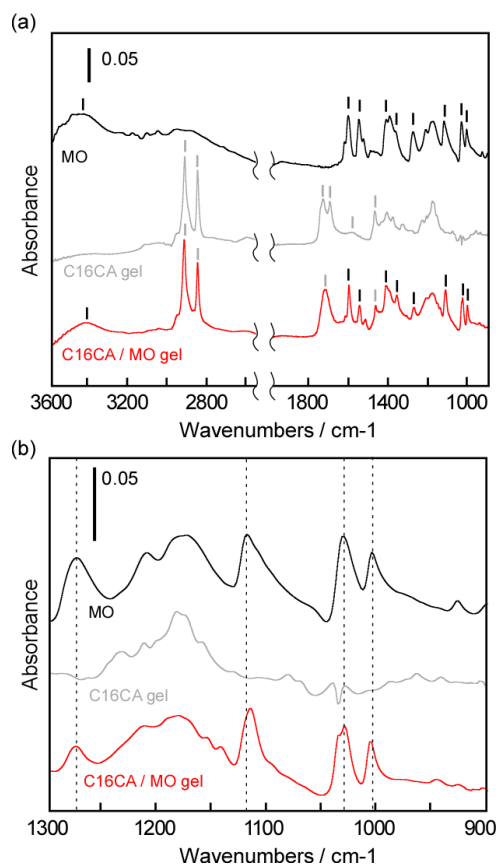

**Figure S1.** FT-IR spectra of MO solution ( $[\text{MO}] = 0.50\text{ mmol/L}$ ), C16CA gel ( $[\text{C16CA}] = 10\text{ mmol/L}$ ), and C16CA/MO gel ( $[\text{C16CA}] = 10\text{ mmol/L}$ ,  $[\text{MO}] = 0.50\text{ mmol/L}$ ) at pH 4.
